# Supplementary material
Source: JCI journal article supplement (doi:10.1172/jci.insight.207998)

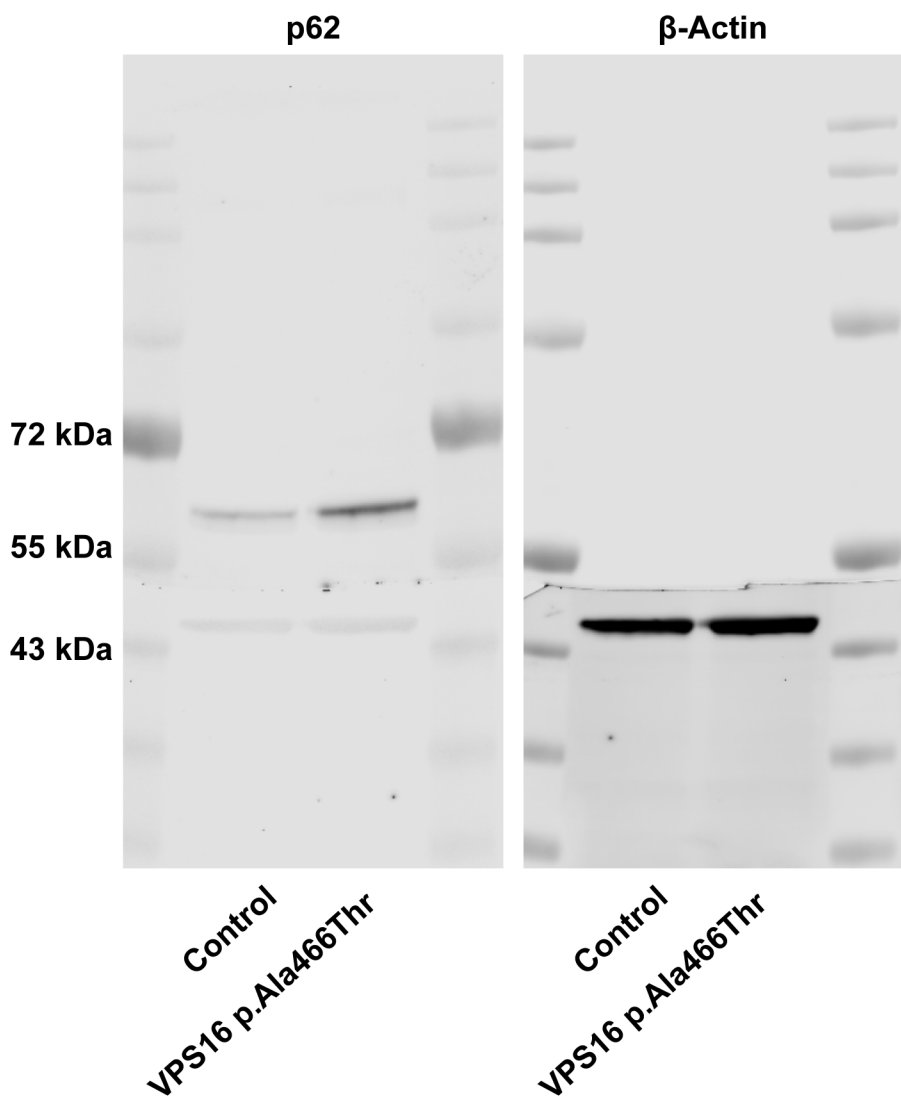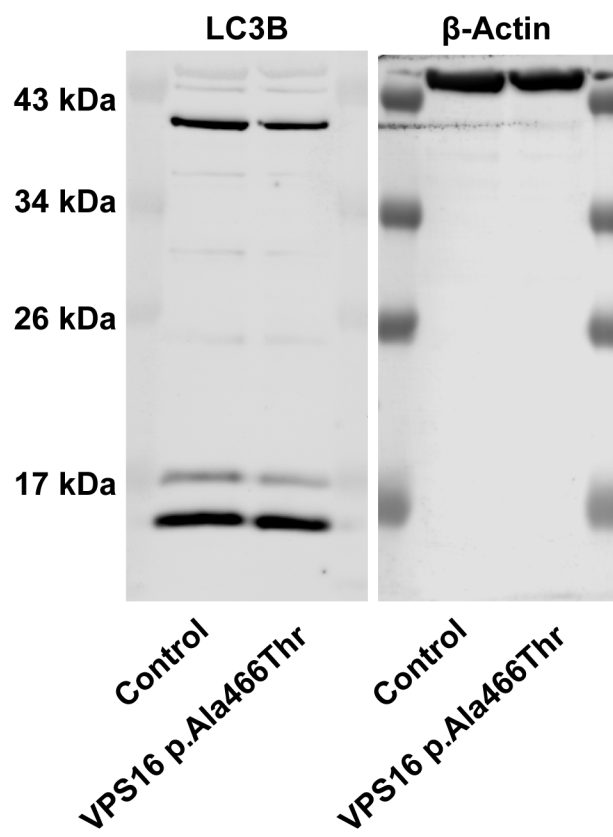

Supplement: sd1 [file 1]
